# Supplementary material for: NiO@MnO2 core–shell composite microtube arrays for high-performance lithium ion batteries
Source: Royal Society of Chemistry journal article supplement (doi:10.1039/c6ra25463b), 2017-01-01
Supplement: c6ra25463b1.pdf [file c6ra25463b1.pdf]

## **Electronic Supplementary Information**

### **NiO@MnO<sub>2</sub> Core-Shell Composite Microtube Arrays for High-Performance Lithium Ion Batteries**

Yuan Zhong, Huan Huang, Kai Wang, Zhishun He, Shasha Zhu, Ling Chang, Haibo Shao,

Jianming Wang\*, Chu-nan Cao

Department of Chemistry, Zhejiang University, Hangzhou 310027, PR China

---

\*Corresponding author.

Tel.: +86-571-87951513; Fax: +86-571-87951895.

E-mail address: [wjm@zju.edu.cn](mailto:wjm@zju.edu.cn) (J.M. Wang)

## Supplementary Figures

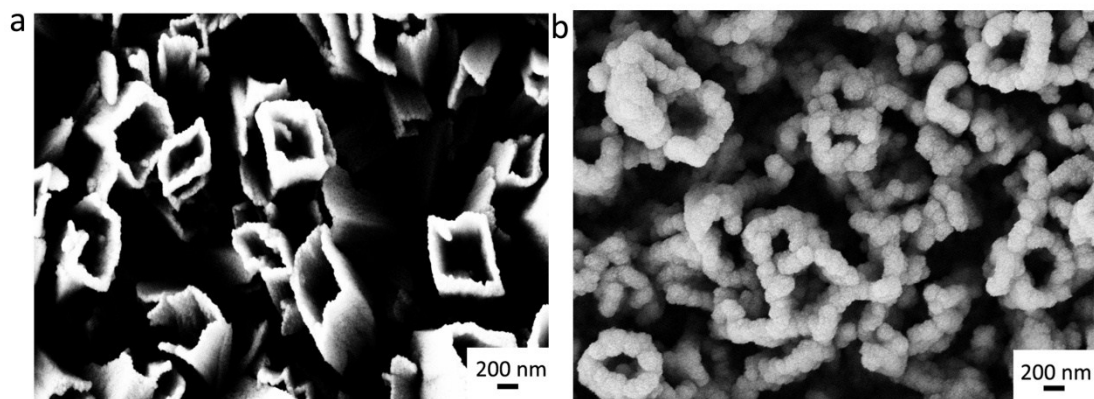

Figure S1 SEM images of the NiO@MnO<sub>2</sub> microtube array films obtained by different electrodeposition times for MnO<sub>2</sub>. (a) 10 s, (b) 90 s.

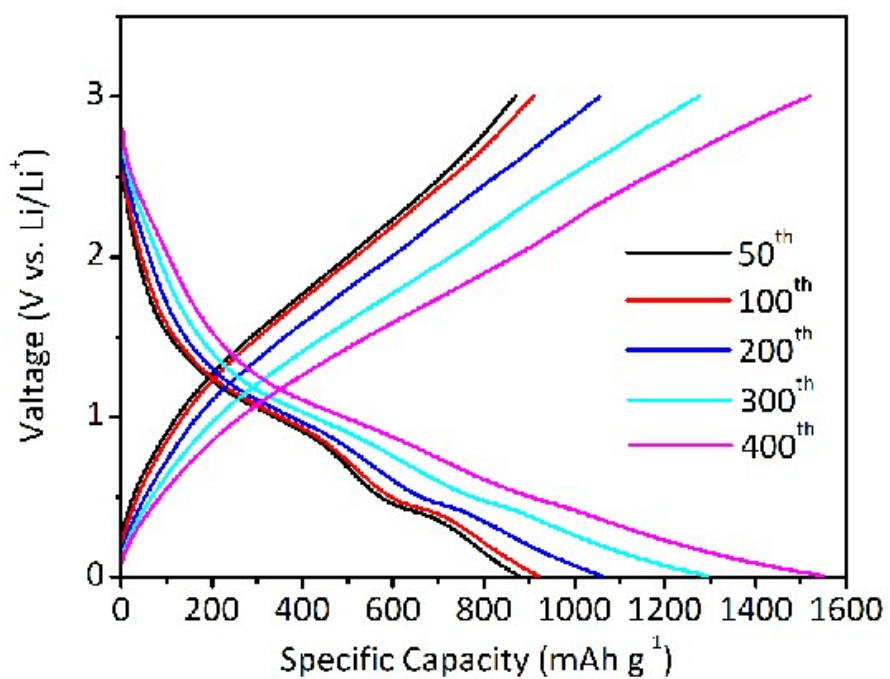

Figure S2 Selected galvanostatic charge-discharge profiles of the NiO@MnO<sub>2</sub> core-shell composite microtube array electrode at a current density of 0.53 A g<sup>-1</sup>.

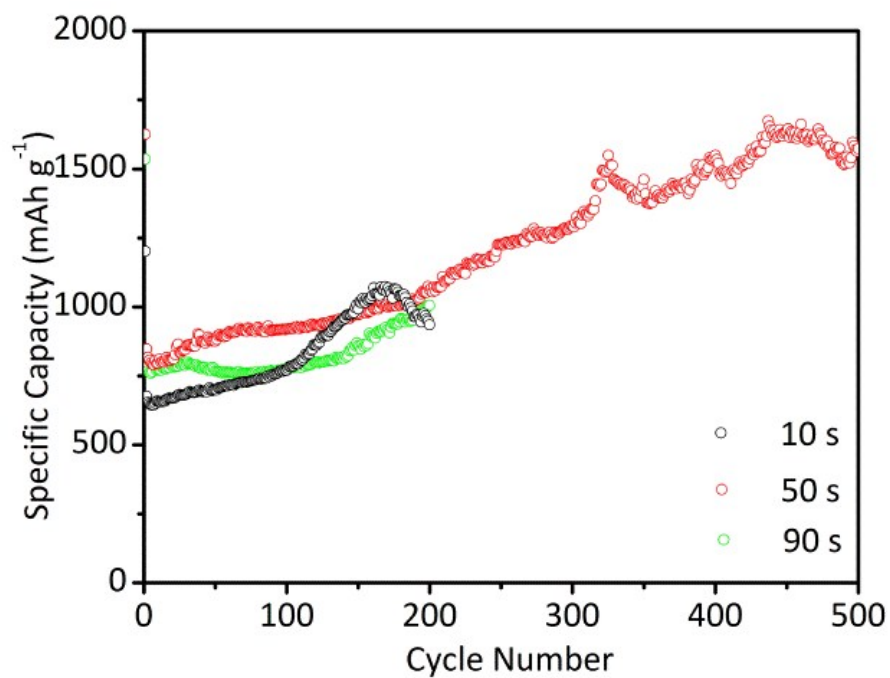

Figure S3 Cycle performances at a current density of  $0.53 \text{ A g}^{-1}$  of the NiO@MnO<sub>2</sub> microtube array film electrodes obtained by different electrodeposition times for MnO<sub>2</sub>.

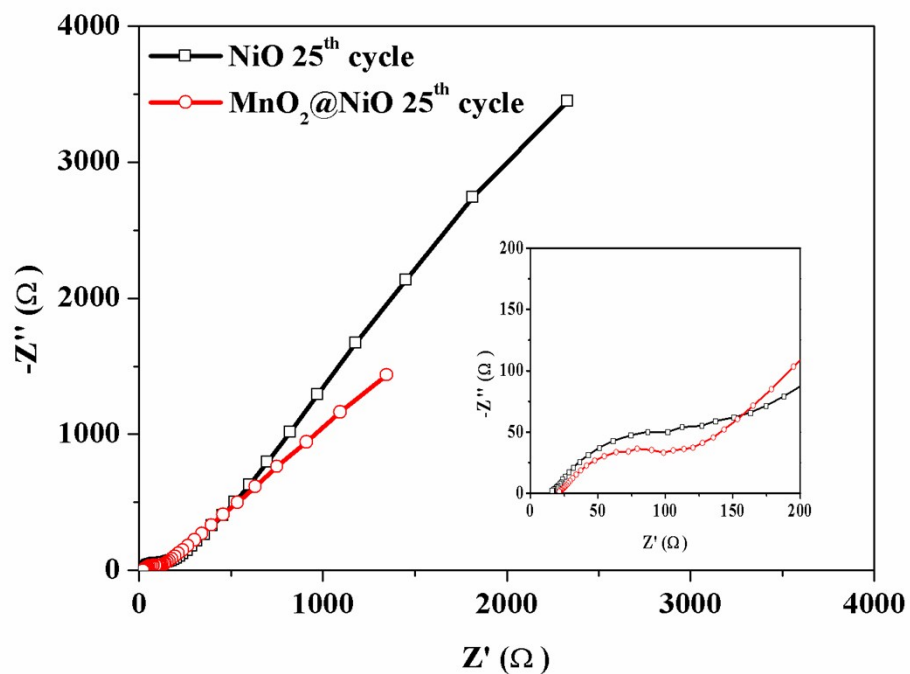

Figure S4 Nyquist plots of the NiO and NiO@MnO<sub>2</sub> microtube array electrodes at open circuit state after 25 cycles at a current density of 0.53 A g<sup>-1</sup>. The inset is the magnified Nyquist plots in the high frequency region.

## Supplementary Table

Table S1 A rough lithium storage performance comparison of the NiO@MnO<sub>2</sub> composite in this work and other binary transition metal oxides in the recently reported references

| Material                                                                          | Capacity / rate                                                                                                                                        | Cycle performance<br>Final capacity / cycle number /<br>rate |
|-----------------------------------------------------------------------------------|--------------------------------------------------------------------------------------------------------------------------------------------------------|--------------------------------------------------------------|
| NiO@MnO <sub>2</sub> microtube<br>arrays<br>(this work)                           | 850 mAh g <sup>-1</sup> / 0.38 A g <sup>-1</sup><br>610 mAh g <sup>-1</sup> / 3.9 A g <sup>-1</sup><br>510 mAh g <sup>-1</sup> / 5.1 A g <sup>-1</sup> | 1573 mAh g <sup>-1</sup> / 500 / 0.53 A g <sup>-1</sup>      |
| MnO <sub>2</sub> @NiO nanorods <sup>1</sup>                                       | 420 mAh g <sup>-1</sup> / 4.0 A g <sup>-1</sup>                                                                                                        | 939 mAh g <sup>-1</sup> / 200 / 1.0 A g <sup>-1</sup>        |
| NiO@MnO <sub>2</sub> nanosheets<br>arrays <sup>2</sup>                            | 1115 mAh g <sup>-1</sup> / 0.5 C<br>950 mAh g <sup>-1</sup> / 2.0 C                                                                                    | 1000 mAh g <sup>-1</sup> / 160 / 0.2 A g <sup>-1</sup>       |
| Ni(OH) <sub>2</sub> @MnO <sub>2</sub> caterpillar<br>arrays <sup>3</sup>          | 940 mAh g <sup>-1</sup> / 1.0 A g <sup>-1</sup>                                                                                                        | 1210 mAh g <sup>-1</sup> / 80 / 0.2 A g <sup>-1</sup>        |
| Co <sub>3</sub> O <sub>4</sub> @MnO <sub>2</sub> nanoconch<br>arrays <sup>4</sup> | 553 mAh g <sup>-1</sup> / 0.48 A g <sup>-1</sup> ,<br>387 mAh g <sup>-1</sup> / 0.96A g <sup>-1</sup>                                                  | 750 mAh g <sup>-1</sup> / 100 / 0.12 A g <sup>-1</sup>       |

### References

1. N. Wang, Y. Zhai, X. Ma and Y. T. Qian, *RSC Adv.*, 2015, **5**, 61148-61154.
2. X. Shang, X. Li, H. Yue, S. Xue, Z. Liu, X. Hou and D. He, *Mater. Lett.*, 2015, **157**, 7-10.
3. T. Wu and K. Liang, *RSC Adv.*, 2016, **6**, 15541-15548.
4. K. Qiu, H. Yan, De. Zhang, Y. Lu, J. Cheng, M. Lu, C. Wang, Y. Zhang, X. Liu and Y. Luo, *J. Solid State Electrochem.*, 2015, **19**, 391-401.
